# Supplementary material for: Reconfiguration of Nematic Disclinations in Plane-Parallel Confinements
Source: MDPI journal article supplement (doi:10.3390/cryst13060904), 2023-06-01
Supplement: s1 [file s1]

**Video S1:** Structural reconfiguration of a pair  $\{1/2, 1/2\}$  disclinations on increasing  $\theta$ . The video is slowed down in the moment of contact to better show the exchange.  $R = 2h = 25 \xi_b$ . Note that the scaling along vertical and horizontal directions are different. Line defects are indicated by colored regions where  $\beta^2 \geq 0.8$ .

**Video S2:** Structural reconfiguration of a pair  $\{-1/2, -1/2\}$  disclinations on increasing  $\theta$ . The video is slowed down in the moment of contact to better show the exchange.  $R = 2h = 25 \xi_b$ . Note that the scaling along vertical and horizontal directions are different. Line defects are indicated by colored regions where  $\beta^2 \geq 0.8$ .

**Video S3:** Structural reconfiguration of a disclination pair  $\{1/2, -1/2\}$  on increasing  $\theta, h < h_c$ .  $R = 2h = 25 \xi_b$ . For presentation purpose the scaling along vertical and horizontal directions is different. Line defects are indicated by colored regions where  $\beta^2 \geq 0.8$ .

**Video S4:** A slowed down video of the structural reconfiguration shown in video S3 with the slowed down focus on the exchange.  $R = 2h = 25 \xi_b$ . For presentation purpose the scaling along vertical and horizontal directions is different. Line defects are indicated by colored regions where  $\beta^2 \geq 0.8$ .

**Video S5:** Structural reconfiguration of a disclination pair  $\{1/2, -1/2\}$  on increasing  $\theta, h > h_c$ .  $R = 2h = 25 \xi_b$ . For presentation purpose the scaling along vertical and horizontal directions is different. Line defects are indicated by colored regions where  $\beta^2 \geq 0.8$ .

**Video S6:** A slowed down video of the structural reconfiguration shown in video S5 with the slowed down focus on the exchange.  $R = 2h = 25 \xi_b$ . For presentation purpose the scaling along vertical and horizontal directions is different. Line defects are indicated by colored regions where  $\beta^2 \geq 0.8$ .
