# Supplementary material for: Reconfiguration of Nematic Disclinations in Plane-Parallel Confinements
Source: MDPI journal article supplement (doi:10.3390/cryst13060904), 2023-06-01
Supplement: s1 [file s1]

Archive with 7 entries (7 files):
- S1.mp4
- S2.mp4
- S3.mp4
- S4.mp4
- S5.mp4
- S6.mp4
- Supplementary material descriptions.pdf
